# Supplementary material
Source: PubMed Central journal article supplement (PMC7812768)
Supplement: pnas.2016978118.sapp.pdf [file pnas.2016978118.sapp.pdf]

## **Supporting Information Appendix**

### **CryoEM Structure and Mechanism of the Membrane-Associated Electron Bifurcating Flavoprotein Fix/EtfABCX**

*Feng et al.*

This document contains:

**Supplementary Tables S1 - 3**

**Supplementary Figures S1 - 10**

**Supplementary Movie S1**

**Supplementary Table S1. Cryo-EM data collection, refinement, and validation statistics for the *T. maritima* EtfABCX complex**

| EtfABCX<br>(EMD-22973, PDB 7KOE)                    |             |
|-----------------------------------------------------|-------------|
| <b>Data collection and processing</b>               |             |
| Microscope                                          | Titan Krios |
| Voltage (kV)                                        | 300         |
| Electron exposure (e <sup>-</sup> Å <sup>-2</sup> ) | 80          |
| Defocus range (-μm)                                 | 1.0 to 2.0  |
| Pixel size (Å)                                      | 1.029       |
| Symmetry imposed                                    | C2          |
| Initial particle images (no.)                       | 2,471,763   |
| Final particle images (no.)                         | 285,377     |
| Map resolution (Å)                                  | 2.9         |
| FSC threshold                                       | 0.143       |
| Map resolution range (Å)                            | 247.0-2.9   |
| <b>Refinement</b>                                   |             |
| Map sharpening B factor (Å <sup>2</sup> )           | 87          |
| Model composition                                   |             |
| Non-hydrogen atoms                                  | 18,348      |
| Protein residues                                    | 2,296       |
| R.m.s. deviations                                   |             |
| Bond lengths (Å)                                    | 0.01        |
| Bond angles (°)                                     | 1.3         |
| <b>Validation</b>                                   |             |
| MolProbity score                                    | 2.25        |
| Clashscore                                          | 10.9        |
| Poor rotamers (%)                                   | 2.18        |
| Ramachandran plot                                   |             |
| Favored (%)                                         | 93.2        |
| Allowed (%)                                         | 6.71        |
| Outliers (%)                                        | 0.1         |

**Supplementary Table S2. Primers for plasmid and strain construction for *Tma* EtfABCX expression in *P. furiosus* (strain MW369)**

| <b>Primer</b>  | <b>Sequence (5'-3')</b>                                                                  | <b>Description</b>                                    |
|----------------|------------------------------------------------------------------------------------------|-------------------------------------------------------|
| <b>GL442</b>   | GATTATTGGGAGGTGGAGAAAAATGGCACATCA<br>CCACCATCACCACCACCATCACGCTAATGTGGT<br>TGTCTGTATCAAAC | pGL093 Gibson assembly (EtfABCX) with 9x his-tag      |
| <b>GL443</b>   | TCACCCGAATTTGTAGAGC                                                                      | pGL093 Gibson assembly (EtfABCX)                      |
| <b>GL444</b>   | GCTCTACAAATTCGGGTGAAATCTTTTTTAGCAC<br>TTTTGGCG                                           | pGL093 Gibson assembly (plasmid backbone)             |
| <b>SP2.055</b> | TTTTCTCCACCTCCCAATAATC                                                                   | pGL093 Gibson assembly (plasmid backbone)             |
| <b>SP.129</b>  | GCCTCCGACTAACGAAAATCC                                                                    | pGL093 PCR confirmation (sequencing)                  |
| <b>SP.130</b>  | GCTAAATACGGAAGGATCTGAGG                                                                  | pGL093 PCR confirmation, (sequencing)                 |
| <b>GL209</b>   | GATCTAAAGCTGGCAGACATC                                                                    | pGL093 PCR confirmation, (sequencing)                 |
| <b>GL445</b>   | TTGAGCGACAGGACGTTT                                                                       | Sequencing, qPCR (EtfA)                               |
| <b>GL446</b>   | AGCAAGACCAGGTCCCAC                                                                       | Sequencing, qPCR (EtfA)                               |
| <b>GL447</b>   | GGATCACAGACCGCAGATG                                                                      | Sequencing, qPCR (EtfB)                               |
| <b>GL448</b>   | GTCTGAAGCGGTATGGTTTCC                                                                    | Sequencing, qPCR (EtfB)                               |
| <b>GL449</b>   | GGTGTGAATCCCATCCTCAC                                                                     | Sequencing, qPCR (EtfC)                               |
| <b>GL450</b>   | CGTTGCTCCATCGTTTCC                                                                       | Sequencing, qPCR (EtfC)                               |
| <b>GL451</b>   | GAACAGATACAGAACGGATGAGG                                                                  | Sequencing, qPCR (EtfX)                               |
| <b>GL452</b>   | CGAATTTACCTCCATTCCACTC                                                                   | Sequencing, qPCR (EtfX)                               |
| <b>SP2.105</b> | AAGTTGTGTGGAGAGCTTTTCG                                                                   | <i>P. furiosus</i> Genome Region 5 (PCR confirmation) |
| <b>SP2.106</b> | CTGGACTCCTTCTAACGCAG                                                                     | <i>P. furiosus</i> Genome Region 5 (PCR confirmation) |

**Supplementary Table S3. Abbreviations used in the text.**

---

|                   |                                                                                                                                                    |
|-------------------|----------------------------------------------------------------------------------------------------------------------------------------------------|
| EtfABCX           | Electron transferring flavoprotein-menaquinone oxidoreductase ABCX (tetrameric, bifurcating)                                                       |
| EtfAB             | Electron transfer flavoprotein (dimeric subcomplex, bifurcating)                                                                                   |
| ETF               | Electron transfer flavoprotein (canonical)                                                                                                         |
| FBEB              | Flavin-based electron bifurcation                                                                                                                  |
| FixABCX           | Electron transferring flavoprotein-menaquinone oxidoreductase ABCX complex found in some N <sub>2</sub> -fixing microbes (tetrameric, bifurcating) |
| Q/QH <sub>2</sub> | Quinone/quinol                                                                                                                                     |
| E                 | Redox potential                                                                                                                                    |
| E°'               | Standard redox potential at pH 7                                                                                                                   |
| E <sub>m</sub>    | Midpoint potential                                                                                                                                 |
| HydABC            | Trimeric [FeFe]-hydrogenase (bifurcating)                                                                                                          |
| HdrA              | Heterodisulfide reductase subunit A                                                                                                                |
| Nfn               | NADH-dependent ferredoxin NADPH oxidoreductase (bifurcating)                                                                                       |
| EtfAB-Bcd         | Electron transferring flavoprotein/Butyryl-CoA dehydrogenase (bifurcating)                                                                         |
| CarCDE            | Caffeyl-CoA reductase (bifurcating)                                                                                                                |
| MvhADG-HdrABC     | Hydrogenase CoB-CoM heterodisulfide reductase (bifurcating)                                                                                        |
| MQ                | Menaquinone                                                                                                                                        |
| BF-FAD            | Bifurcating FAD                                                                                                                                    |
| ET-FAD            | Electron transfer FAD                                                                                                                              |
| QR-FAD            | Quinone reductase FAD                                                                                                                              |
| CT                | Charge transfer complex                                                                                                                            |
| <i>Pae</i>        | <i>Pyrobaculum aerophilum</i>                                                                                                                      |
| <i>Tma</i>        | <i>Thermotoga maritima</i>                                                                                                                         |
| Fd                | Ferredoxin                                                                                                                                         |
| LDAO              | Lauryldimethylamine N-oxide                                                                                                                        |
| DDM               | n-Dodecyl-β-D-maltoside                                                                                                                            |
| ETF-QO            | ETF ubiquinone oxidoreductase                                                                                                                      |
| RMSD              | root-mean-square deviation of atomic positions                                                                                                     |
| HH                | Horizontal helix                                                                                                                                   |
| mV                | Millivolt                                                                                                                                          |
| OX                | Oxidized                                                                                                                                           |
| ASQ               | Anionic semiquinone                                                                                                                                |
| NSQ               | Neutral semiquinone                                                                                                                                |
| HQ                | Hydroquinone                                                                                                                                       |

---

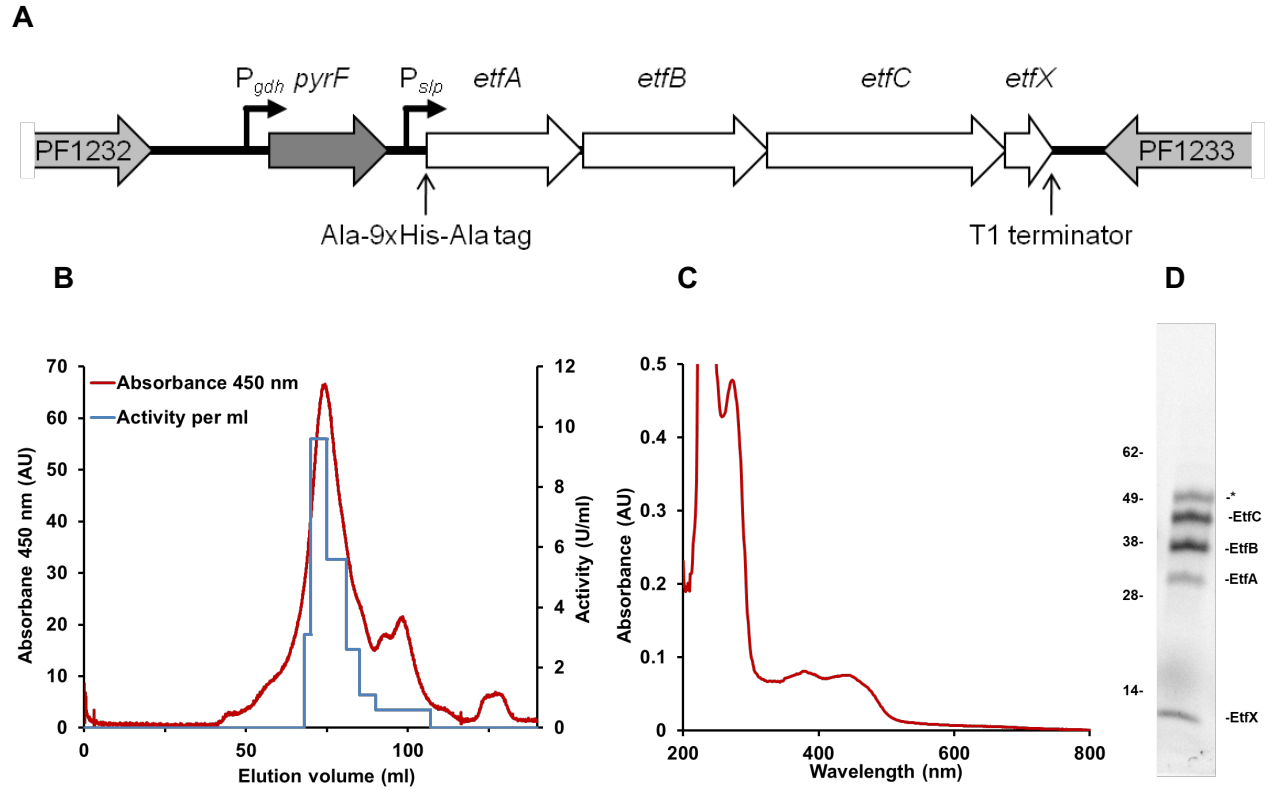

**Supplementary Figure S1. A.** Arrangement of the *T. maritima* EtfABCX expression cassette (PslpetfABCX) inserted into the *P. furiosus* genome. **B.** Size exclusion column (Superdex S200 column; 16/60; Cytiva) elution profile for Tma EtfABCX. Fractions were analyzed for flavin content ( $A_{450}$ , red trace) and NADH oxidation activity (discontinuous blue trace). **C.** UV/vis spectrum of Tma EtfABCX. **D.** Gel electrophoresis of the purified EtfABCX sample used structure determination (\*indicates and unknown contaminating protein).

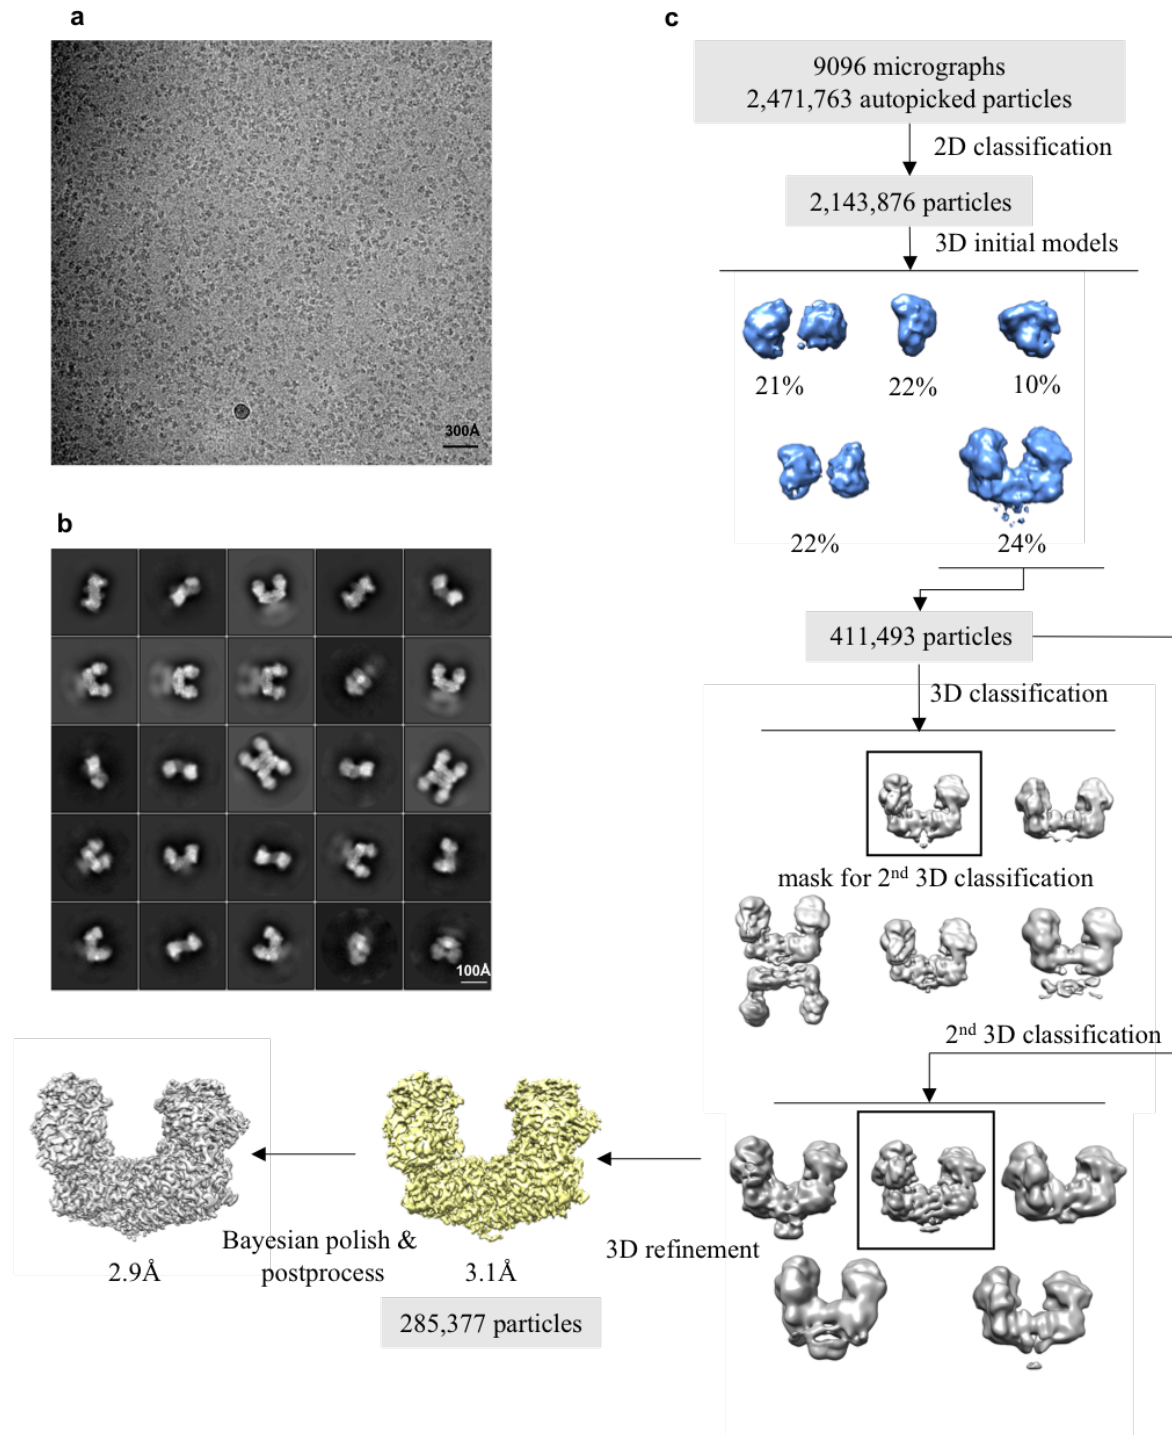

**Supplementary Figure S2. Cryo-EM of the Tma EtfABCX complex.** (a) A typical electron micrograph. (b) 2D class averages demonstrating a heterogeneous population of particles. (c) Flow chart of 2D and 3D classifications, and 3D refinement and reconstruction.

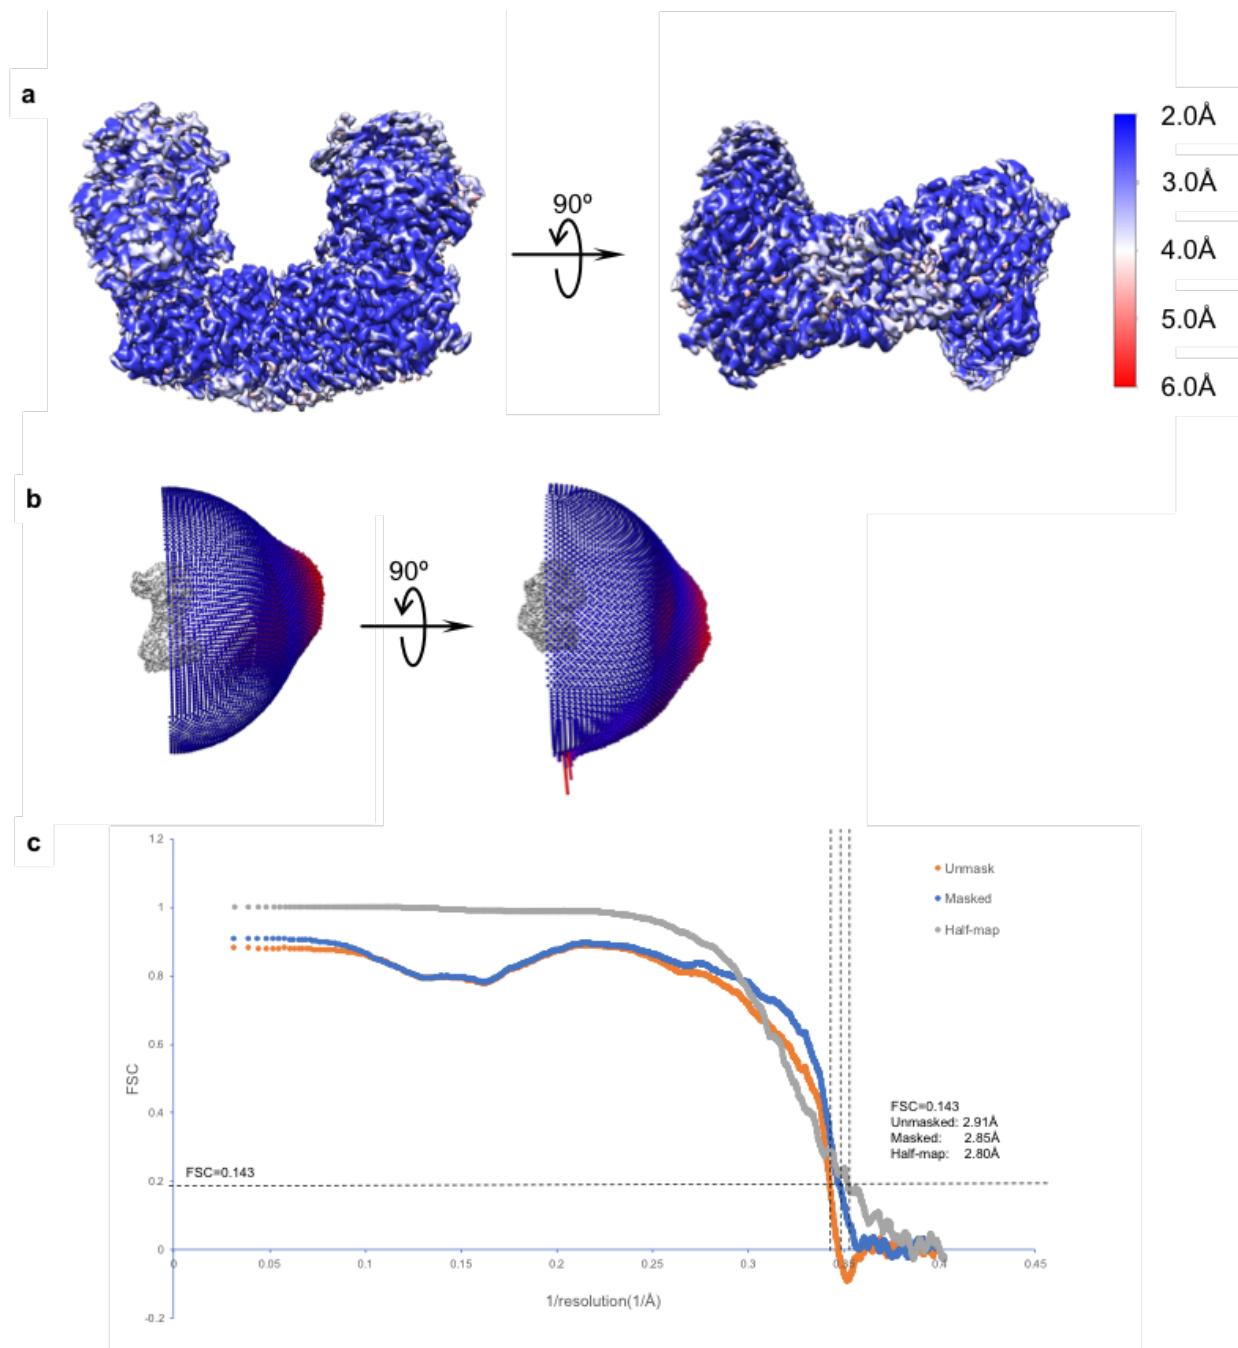

**Supplementary Figure S3. Analysis of the electron density map.** Local resolution (a), angular distribution of the raw particle images (b) and Fourier shell correlation (FSC) curve (c) for masked and unmasked 3D map of the EtfABCX complex.

|              | “X” shaped particles                                                              | “U” shaped particles                                                                |
|--------------|-----------------------------------------------------------------------------------|-------------------------------------------------------------------------------------|
| Detergent    | 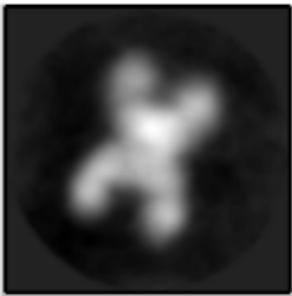 |  |
| No detergent | 8.4%                                                                              | 5.1%                                                                                |
| 0.02% DDM    | 0.0%                                                                              | 13.1%                                                                               |
| 0.01% LDAO   | 4.3%                                                                              | 8.0%                                                                                |

**Supplementary Figure S4. Detergent breaks the in vitro hydrophobic interface between two (EtcABCX)<sub>2</sub> octamers.** (A) A typical view of the X-shaped particles comprised of two copies of (EtfABCX)<sub>2</sub> docked end-to-end via their respective membrane-embedding hydrophobic surface. (B) A typical side view of the U-shaped (EtfABCX)<sub>2</sub> complex. The population of two arrangement can be told by comparing the size of 2D classes. After adding detergents, the distribution of the particles strongly favored octamer rather than 16-mer assembly.



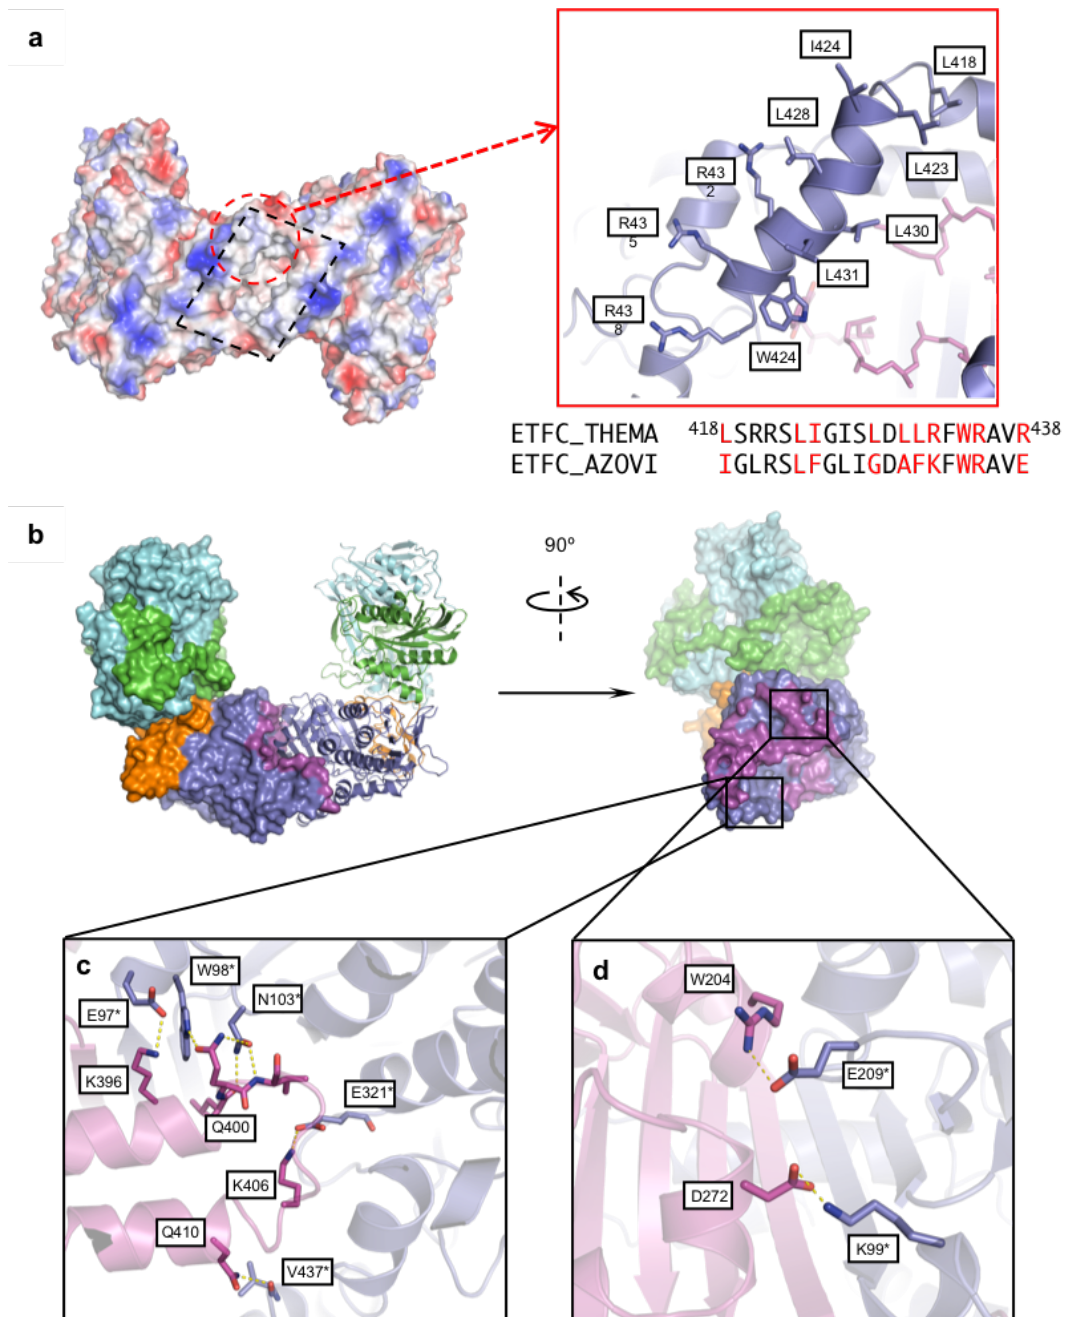

**Supplementary Figure S5. The dimerization interface in the EtfC dimer.** (a) A bottom view of the surface charge plot of EtfABCX. The central region may sink into the lipid bilayer as it contains a hydrophobic patch that is surrounded by positively charged residues. The positive residues may bind the negatively charged head group of the phospholipids. (b) The EtfC-EtfC dimer interface. Left: front side view of the EtfABCX super dimer. Right: right side view with the front protomer 2 removed to show the dimer interface in EtfC. (c) The C-terminal helix-turn-helix inserts into the groove of a symmetry-related protomer, forming hydrophobic and charge interactions. (d) Inter-molecular  $\beta$ -sheet (background) and salt bridges of two short  $\alpha$ -helix form the extensive dimer interface. Amino acid number with an asterisk refers to residue from the symmetry-related protomer.

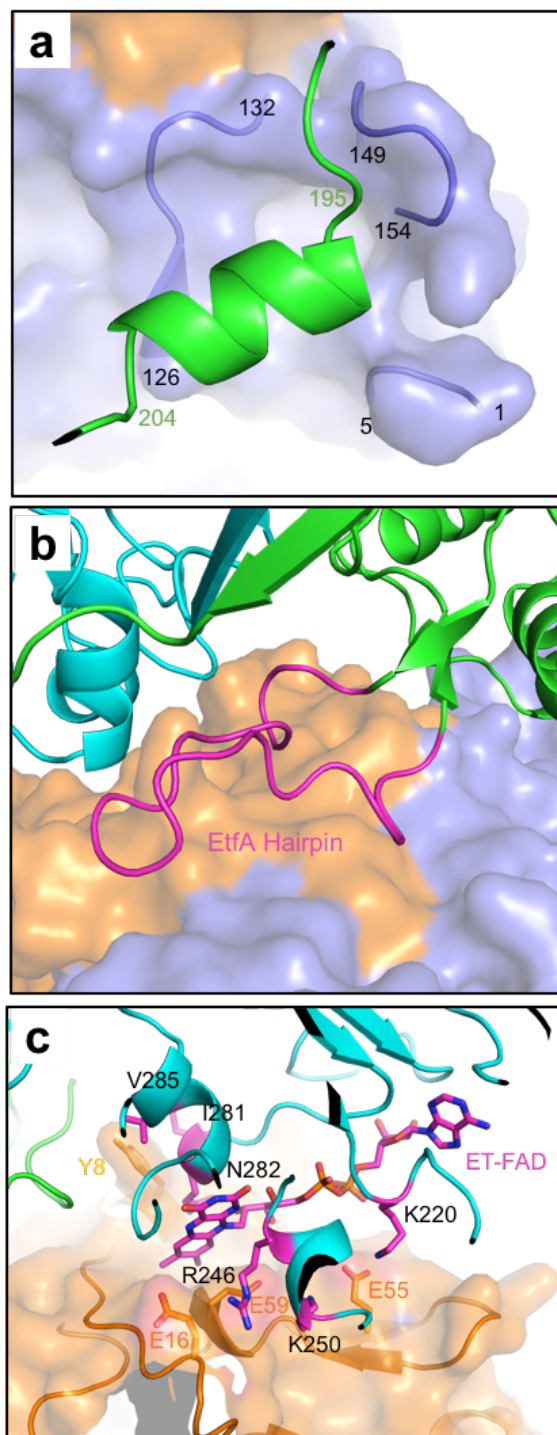

**Supplementary Figure S6. Three Interfaces between EtfAB and EtfCX.** EtfA has two interfaces with EtfC (a, b) and EtfB has one interface with EtfX (c). The interface between EtfB and EtfX also form the binding pocket for ET-FAD.

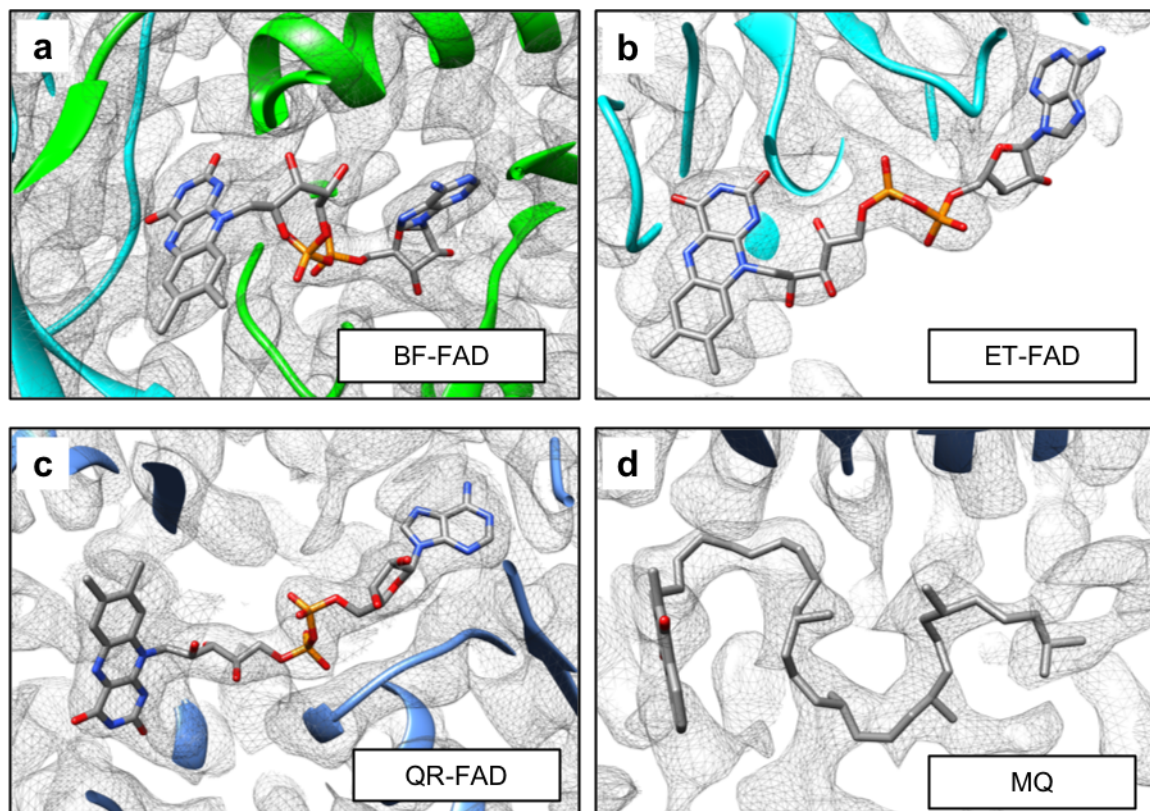

**Supplementary Figure S7. The electron densities of the three bound FAD molecules and one MQ in cryo-EM map of the EtfABCX. The electron densities surrounding BF-FAD (a), ET-FAD (b), QR-FAD (c), and MQ (d) are surface rendered and shown in grey meshes.**

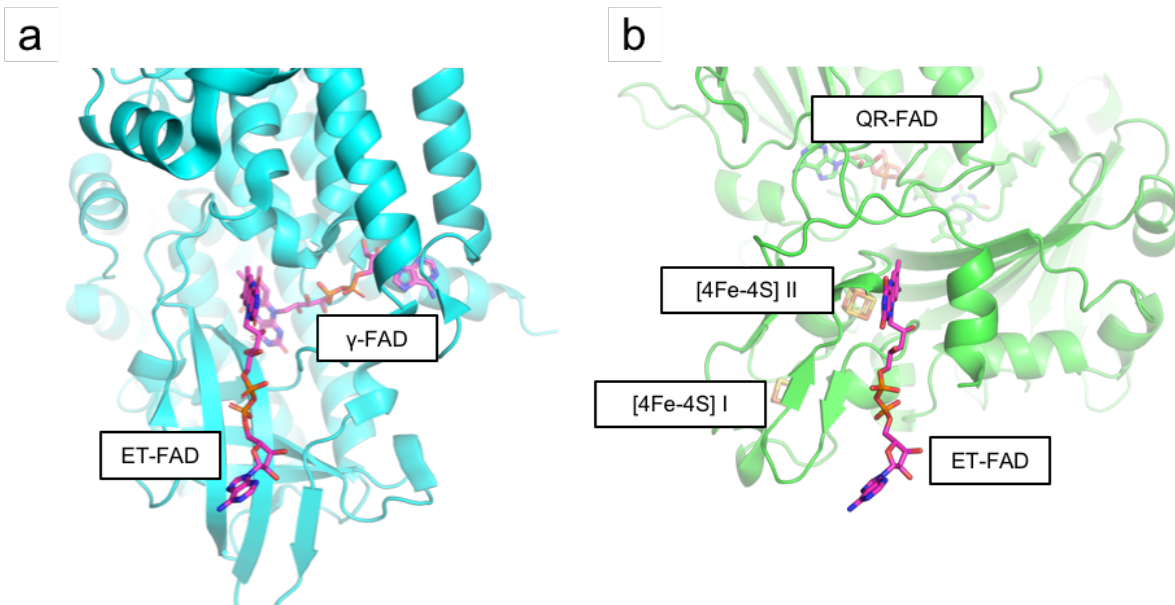

**Supplementary Figure S8. Coupling with the ET-FAD in Bcd-EtfAB and EtfABCX.** Bcd (PDB ID 6FAH) and EtfCX are colored cyan and green, respectively. The two complexes are superimposed by aligning their respective Domain II. Domain II is hidden for simplicity. FADs are shown as magenta sticks.

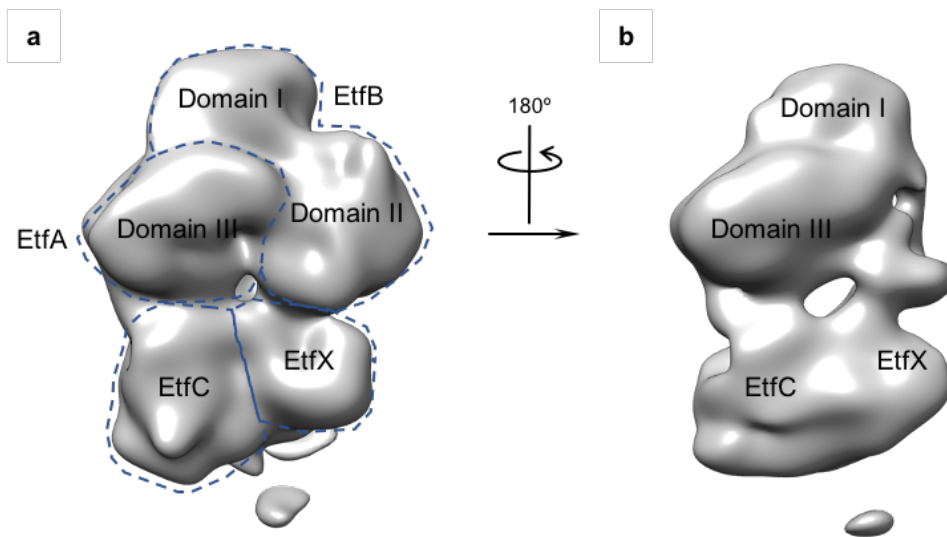

**Supplementary Figure S9. Comparison of 3D maps of two monomeric EtfABCX particles indicates the domain II flexibility.** (a) EtfABCX particles with defined density for domain II. (b) EtfABCX particles with the domain II density largely missing.

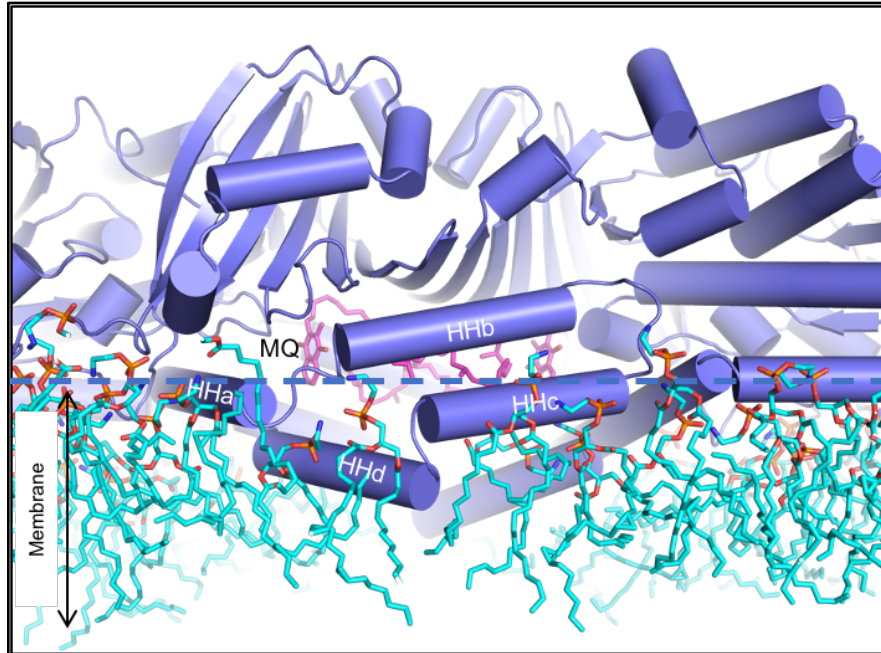

**Supplementary Figure S10. MD simulation of the phospholipid binding region on the lower surface of EtfC comprised of the C-terminal four helices HHa-HHd.** In this side view, the negatively charged head groups of lipids bind the positively charged residues and the lipid tails interact with the hydrophobic residues of the two HHd helices.

**Supplementary Movie S1.** A comparison of the location and orientation of EtfAB domain II in different states. The models were generated using previously solved EtfAB under different states as templates. The movement between different models were generated using “morph” command in ChimeraX <sup>1</sup>, which is also used to generate the movie.

- 1 Goddard, T. D. *et al.* UCSF ChimeraX: Meeting modern challenges in visualization and analysis. *Protein science : a publication of the Protein Society* **27**, 14-25, doi:10.1002/pro.3235 (2018).
